# Supplementary material
Source: PubMed Central journal article supplement (PMC5521977)

## SUPPLEMENTARY DATA

**Supplementary Table 1.** Clinical features of the study population undergoing the hyperinsulinemic-euglycemic clamp according to the *TCF7L2* rs7903146 genotype

| Table 2. Clinical features of the study population undergoing the hyperinsulinemic-euglycemic clamp according to the <i>TCF7L2</i> rs7903146 genotype. |               |               |               |          |
|--------------------------------------------------------------------------------------------------------------------------------------------------------|---------------|---------------|---------------|----------|
|                                                                                                                                                        | <b>CC</b>     | <b>CT</b>     | <b>TT</b>     | <b>P</b> |
| <b>N</b>                                                                                                                                               | 16            | 25            | 5             |          |
| <b>Age (years)</b>                                                                                                                                     | 15.2 ± 3.0    | 14.8 ± 2.4    | 15.6 ± 4.0    | 0.812    |
| <b>Gender (M/F), %</b>                                                                                                                                 | 37/63         | 60/40         | 60/40         | 0.363    |
| <b>BMI (kg/m<sup>2</sup>)</b>                                                                                                                          | 36.2 ± 6.8    | 35.1 ± 6.7    | 34.2 ± 9.9    | 0.810    |
| <b>Fasting Glucose (mg/dl)</b>                                                                                                                         | 95.3 ± 10.6   | 94.8 ± 5.6    | 101.5 ± 13.0  | 0.684    |
| <b>Fasting Insulin (μU/mL)</b>                                                                                                                         | 24.1 ± 14.0   | 25.2 ± 14.0   | 22.0 ± 6.2    | 0.553    |
| <b>Fasting Glucagon (ng/ml)</b>                                                                                                                        | 55.2 ± 17.0   | 59.8 ± 13.8   | 57.8 ± 14.5   | 0.846    |
| <b>Clamp Steady State Insulin (μU/mL)</b>                                                                                                              | 187.4 ± 47.0  | 189.5 ± 36.7  | 170.0 ± 45.9  | 0.820    |
| <b>M/m<sup>2</sup> (mg/m<sup>2</sup>/min) (8 units)</b>                                                                                                | 33.6 ± 17.7   | 44.6 ± 16.5   | 34.4 ± 21.0   | 0.402    |
| <b>M/m<sup>2</sup> (mg/m<sup>2</sup>/min) (80 units)</b>                                                                                               | 203.9 ± 103.0 | 243.0 ± 114.4 | 334.4 ± 193.2 | 0.230    |

## SUPPLEMENTARY DATA

**Supplementary Figure 1. Diabetes-risk (Kaplan-Meier curves) in carriers of different TCF7L2 rs7903146 genotypes in obese adolescents.** Analysis using Kaplan-Meier curves in the whole population indicated that the carriers of rs7903146 CT/TT (red line) genotypes had greater risk of IGT/T2D than CC (blue line) genotype carriers. The log rank test comparing the plots of the complement of the Kaplan-Meier estimates between risk allele carriers (CT or TT) and non-carriers (CC) showed that this relationship was statistically significant ( $p=0.001$ ).

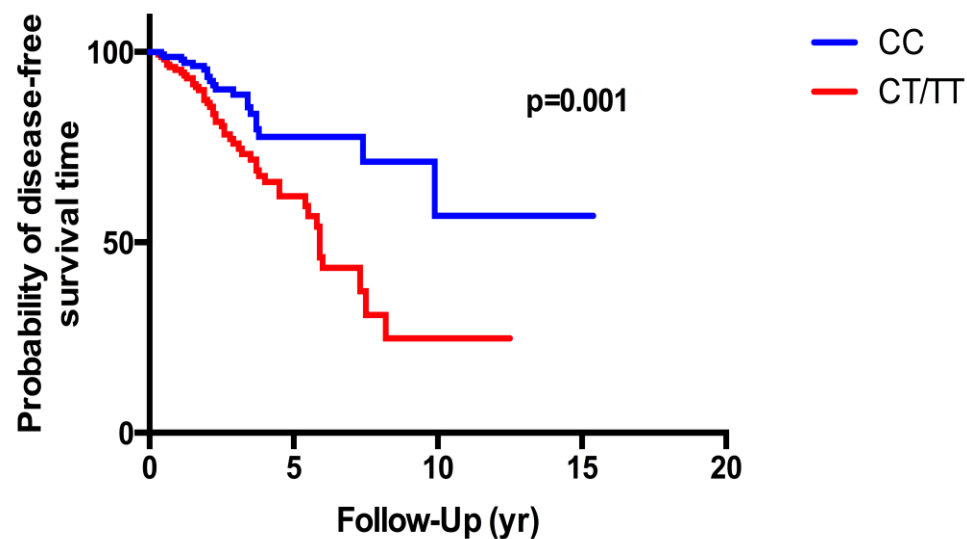

Supplement: DC170290SupplementaryData.pdf [file DC170290SupplementaryData.pdf]
